# Supplementary material
Source: PubMed Central journal article supplement (PMC10841690)
Supplement: NIHMS1933292-supplement-4.pdf [file NIHMS1933292-supplement-4.pdf]

## Supplementary Figure S4

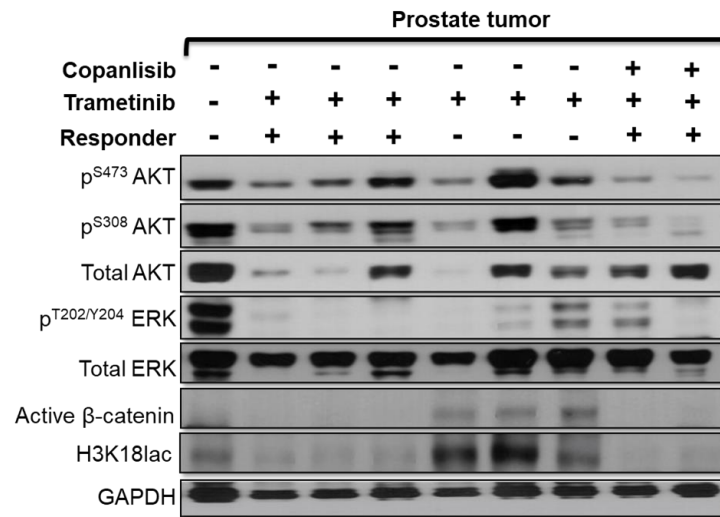

**Supplementary Figure S4. PI3Ki/MEKi combination therapy suppresses histone lactylation in 80% of Pb-Cre;PTEN<sup>fl/fl</sup>Trp53<sup>fl/fl</sup> mice.** (A) Pb-Cre;PTEN<sup>fl/fl</sup>Trp53<sup>fl/fl</sup> mice with established prostate tumors were treated with trametinib (3 mg/kg, *po*, every day), singly and in combination with copanlisib (14 mg/kg, *iv*, every alternate day) for 28 days. Western blot analyses were performed for indicated protein markers on prostate tumor extracts. n=5-6 mice per group (experimental male mice with the correct genotype were obtained following screening of 79 littermates derived from 11 breeding pairs and randomized until the indicated number of mice achieved in each group).
