# Supplementary material
Source: PubMed Central journal article supplement (PMC10841690)
Supplement: NIHMS1933292-supplement-5.pdf [file NIHMS1933292-supplement-5.pdf]

## Supplementary Figure S5

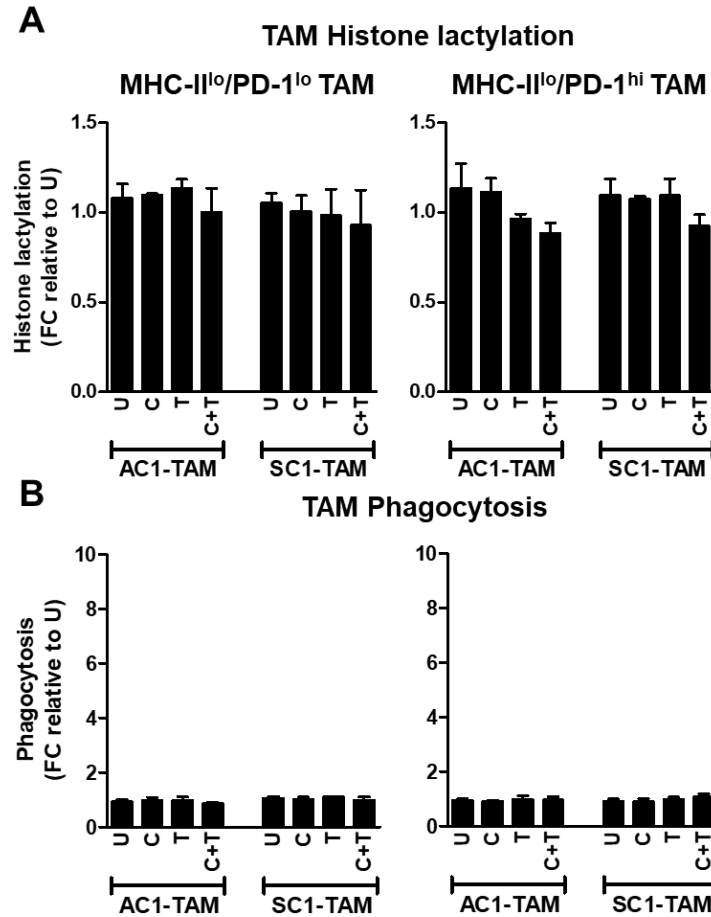

**Supplementary Figure S5. Conditioned media from PI3Ki/MEKi-treated PC cells does not alter MHC-II<sup>lo</sup> TAM histone lactylation and phagocytosis.** (A-B) Single cell suspensions of PTEN/p53-deficient prostate GEM tumors were treated with copanlisib (C, 100 nM), trametinib (T, 5 nM) or their combination for 24 hours, and conditioned media (CM) was collected at the end of treatment. FACS-sorted TAM from untreated PTEN/p53-deficient GEM tumors were incubated in CM *ex vivo* for 24 hours followed by co-culture with CTV dye stained-AC1/SC1 cells for 2 hours. Bar graphs demonstrate histone lactylation status (A) and phagocytic activity (B) of MHC-II<sup>lo</sup>/PD-1<sup>hi/lo</sup> expressing TAM, relative to untreated group. FC = fold change. n=2 independent biological experiments. Significances/p-values were calculated by one-way ANOVA.
