# Supplementary material
Source: PubMed Central journal article supplement (PMC10841690)
Supplement: NIHMS1933292-supplement-6.pdf [file NIHMS1933292-supplement-6.pdf]

## Supplementary Figure S6

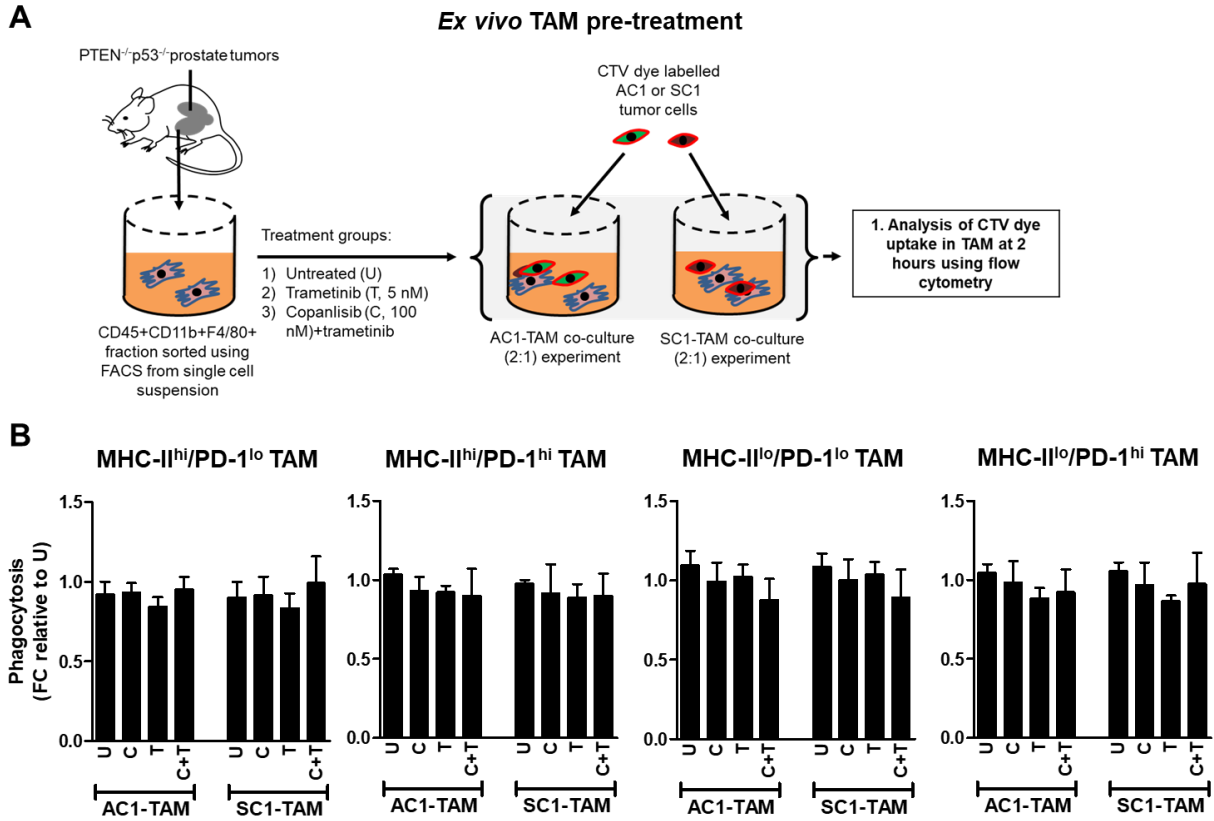

**Supplementary Figure S6. Direct treatment of TAM with PI3Ki/MEKi does not alter their phagocytic capacity.** (A) Schema illustrating direct treatment of FACS-sorted TAM subsets (PD-1<sup>hi/lo</sup>MHC-II<sup>hi/lo</sup>) from PTEN/p53-deficient prostate GEMM tumors with copanlisib (C, 100 nM), trametinib (T, 5 nM) or their combination for 24 hours. Following treatment, TAM were co-cultured with CTV dye stained-AC1/SC1 cells for 2 hours, and phagocytosis quantification was performed. (B) Bar graphs demonstrate fold change (FC) phagocytic activity of MHC-II<sup>hi/lo</sup>/PD-1<sup>hi/lo</sup> expressing TAM, relative to untreated group. n=2 independent biological experiments. Significances/p-values were calculated by one-way ANOVA.
