# Supplementary material
Source: PubMed Central journal article supplement (PMC10841690)
Supplement: NIHMS1933292-supplement-7.pdf [file NIHMS1933292-supplement-7.pdf]

## Supplementary Figure S7

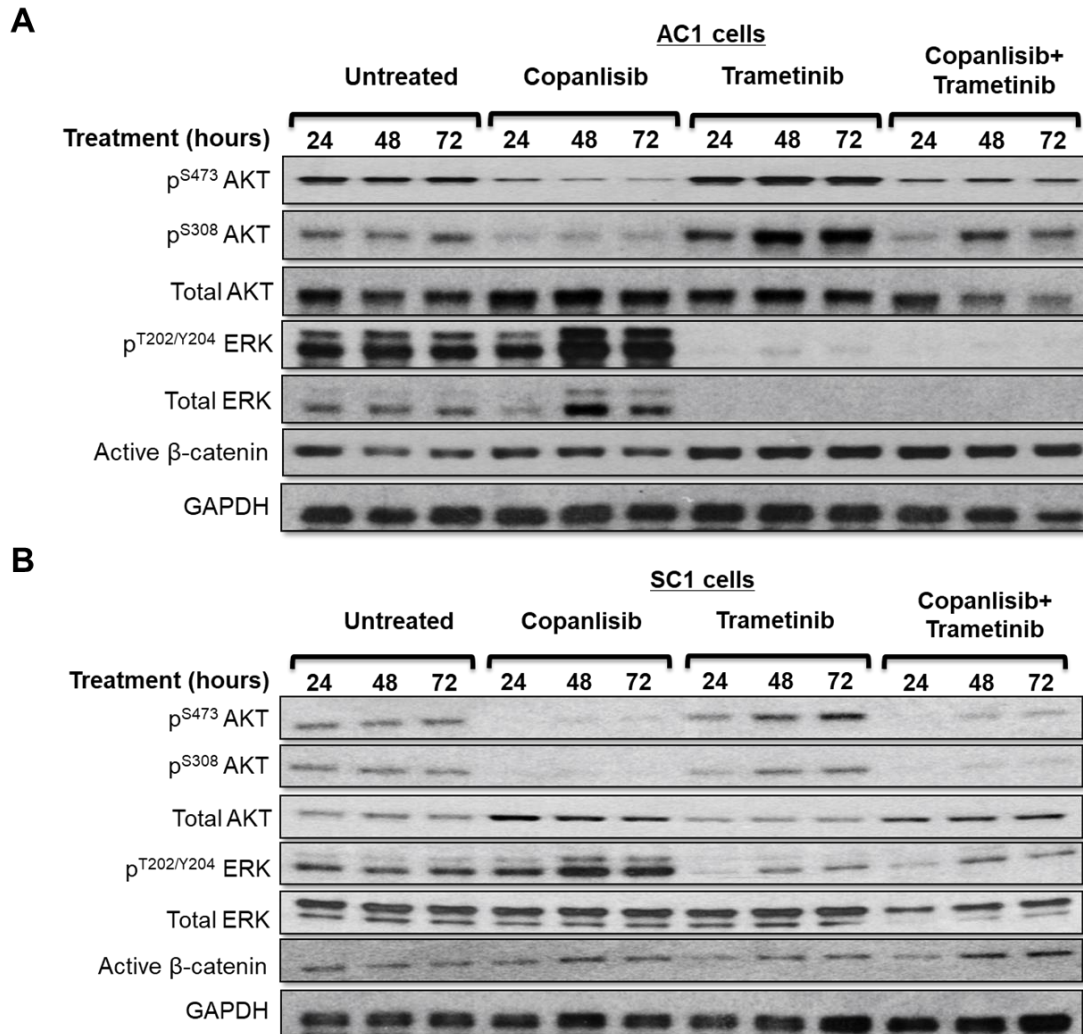

**Supplementary Figure S7. PI3Ki/MEKi combination therapy for 72 hours activates Wnt/ $\beta$ -catenin pathway in PTEN/p53-deficient prostate GEMM tumor derived cell lines. (A-B) AC1/SC1 cells were treated with copanlisib (C, 100 nM), trametinib (T, 5 nM) or their combination for 24, 48 and 72 hours. Following treatment, western blot analyses with indicated protein markers were performed on AC1 (A) and SC1 (B) cell lysates. n=3 independent biological experiments.**
