# Supplementary material
Source: PubMed Central journal article supplement (PMC10841690)
Supplement: NIHMS1933292-supplement-10.pdf [file NIHMS1933292-supplement-10.pdf]

Supplementary Figure S10

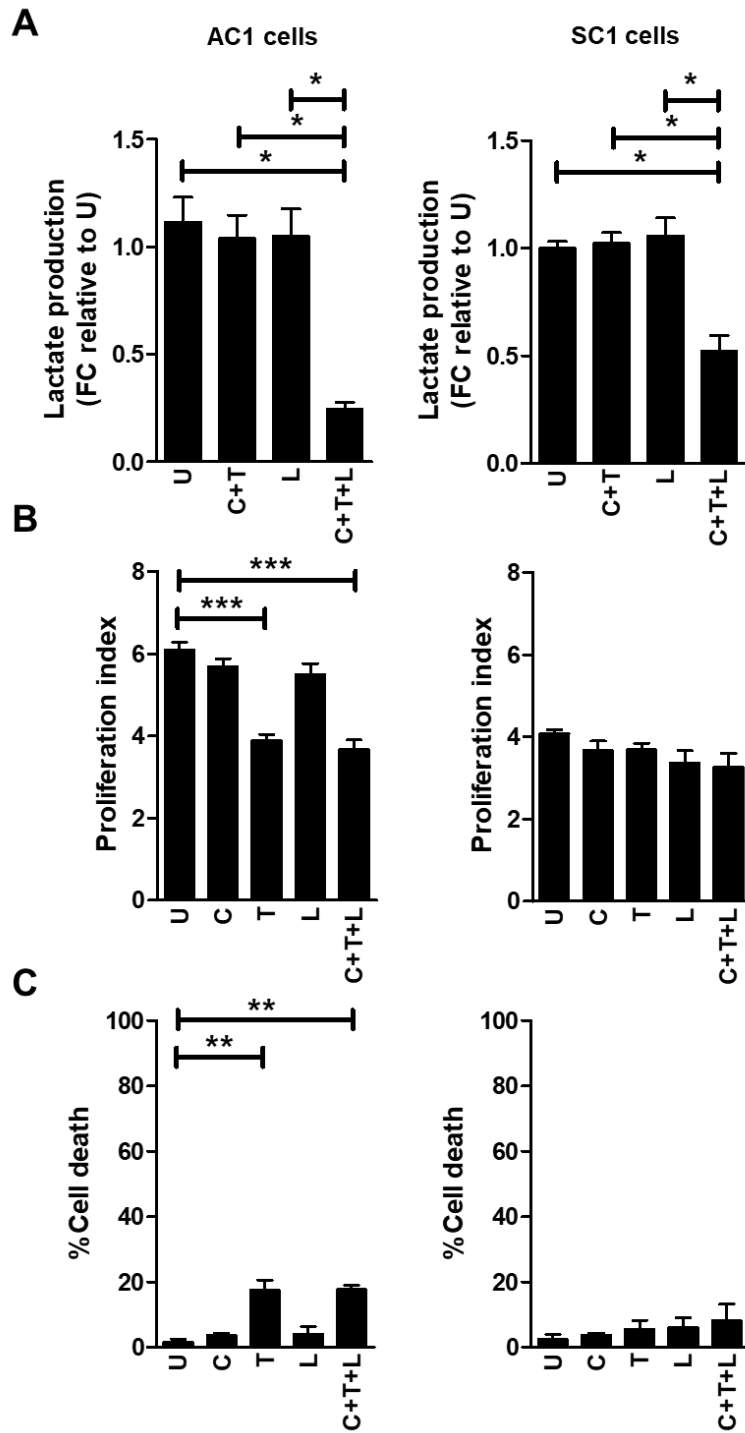

Supplementary Figure S10. PORCNI in combination with PI3Ki + MEKi inhibits lactate production from PTEN/p53-deficient GEMM tumor-derived PC cells. (A) AC1/SC1 cells

were treated with copanlisib (C, IC<sub>90</sub>=100 nM), trametinib (T, IC<sub>90</sub>=5 nM), LGK`974 (L, IC<sub>90</sub>=50 nM) or their combination for 72 hours. *In vitro* CM were collected following treatment and analyzed for lactate content using colorimetry kits. (B) Proliferation index was calculated by counting number of tumor cells in each well, relative to their baseline seeding density. (C) Following treatments, tumor cells were stained for annexin V antibody/propidium iodide and % cell death were analyzed using flow cytometry. n=3 independent biological experiments. Significances/p-values were calculated by one-way ANOVA and indicated as follows, \*p<0.05, \*\*p<0.01 and \*\*\*p<0.001.
