# Supplementary material
Source: PubMed Central journal article supplement (PMC10841690)
Supplement: NIHMS1933292-supplement-13.pdf [file NIHMS1933292-supplement-13.pdf]

**Supplementary Table S1. PI3Ki + MEKi + PORCNI therapy results in tumor clearance in Pb-Cre;PTEN<sup>fl/fl</sup>Trp53<sup>fl/fl</sup> mice.** Pb-Cre;PTEN<sup>fl/fl</sup>Trp53<sup>fl/fl</sup> mice with established tumors were treated with copanlisib (C, 14 mg/kg, *iv*, every alternate day) + trametinib (T, 3 mg/kg, *po*, every day) + LGK`974 (L, 3 mg/kg, *po*, every day) for 28 days and approximately 7 months, as described in Methods section. At the end of treatment, harvested tumors were formalin fixed, paraffin embedded and individual slides were stained with H&E and scored in a blinded fashion by pathologist for histopathological response, as indicated in the table.

| Pathological assessment of PTEN/p53-deficient murine prostate tumors <sup>#</sup>                             |                    |                              |                                                |                         |                       |
|---------------------------------------------------------------------------------------------------------------|--------------------|------------------------------|------------------------------------------------|-------------------------|-----------------------|
| Treatments                                                                                                    | Treatment response | Benign prostatic hyperplasia | High grade-prostatic intraepithelial neoplasia | Invasive adenocarcinoma | Sarcomatoid carcinoma |
| Untreated (28 days)                                                                                           | No                 | 0/6                          | 6/6                                            | 5/6                     | 5/6                   |
| C+T+L (11 months)                                                                                             | Yes                | 3/3                          | 0/3                                            | 0/3                     | 0/3                   |
| C+T+L (28 days)                                                                                               | Yes                | 5/5**                        | 0/5*                                           | 0/5*                    | 0/5*                  |
| C+T (28 days)                                                                                                 | Yes                | 4/4*                         | 0/4*                                           | 0/4*                    | 0/4*                  |
|                                                                                                               | No                 | 0/1                          | 1/1                                            | 1/1                     | 1/1                   |
| L (28 days)                                                                                                   | No                 | 1/3                          | 2/3                                            | 2/3                     | 2/3                   |
| T (28 days)                                                                                                   | Yes                | 3/3*                         | 0/3*                                           | 0/3*                    | 0/3*                  |
|                                                                                                               | No                 | 2/3                          | 1/3                                            | 1/3                     | 3/3                   |
| C (28 days)                                                                                                   | Yes                | 3/3*                         | 0/3*                                           | 0/3*                    | 0/3*                  |
|                                                                                                               | No                 | 1/4                          | 2/4                                            | 1/4                     | 2/4                   |
| <sup>#</sup> Number of tumors positive for given pathological characteristic/Total number of tumors evaluated |                    |                              |                                                |                         |                       |
